# Supplementary material for: Human HEL308 Localizes to Damaged Replication Forks and Unwinds Lagging Strand Structures
Source: PubMed Central journal article supplement — J Biol Chem. 2011 Mar 11;286(18):15832–40. doi: 10.1074/jbc.M111.228189 (PMC3091193; doi:10.1074/jbc.m111.228189), 2011-03-11
Supplement: supp_M111.228189_jbc.M111.228189-1.pdf [file supp_M111.228189_jbc.M111.228189-1.pdf]

## Supplemental Figure Legends

Supplemental Fig. S1. **Generation of stable GFP-HEL308 expressing clones.** Protein extracts from U2OS cells stably transfected with GFP-HEL308 (GFP-HEL308), stably transfected with an empty GFP control construct (GFP) or not transfected (U2OS) were run on 7.5 % SDS-PAGE gels and immunoblotted with antibodies directed against GFP (*left-hand panel*) and HEL308 (*right-hand panel*).

Supplemental Fig. S2. **Purification of human HEL308 from insect cells.** *A.* Schematic representation of sequential columns used to purify HEL308. *B.* Coomassie-stained 7.5 % SDS-PAGE gel containing equal volumes of indicated elution fractions obtained from (final) Heparin column. *Lane* labelled 'load' contains the input material after the SUPERDEX200 purification step, *lane* labelled 'FT' represents the unbound proteins (flow-through), and *lane* labelled 'wash' shows contamination washed off the column. *C.* Gel filtration profile of HEL308 obtained on a SUPERDEX 200 column.

Supplemental Fig. S3. **HEL308<sup>K365M</sup> displays no unwinding activity.** The 3'-overhang partial duplex (lanes 1-3), splayed arms (lanes 4-6), fork-lagging strand (lanes 7-9) and fork lagging strand with labelled nascent lagging strand (lanes 10-12) substrates listed in Supplemental Table 1 were 5'-end labelled as shown by the position of the asterisk. Substrates were mock-treated (0 pmol/ $\mu$ l lane) in lanes marked nt, treated with 1 pmol/ $\mu$ l of HEL308<sup>K365M</sup> in lanes marked +, or boiled to fully denature substrates in lanes marked B. For each set of substrates, the position of the substrate and fully unwound/denatured products are marked.

Supplemental Fig. S4. **Defining the minimal length of the 3'-ssDNA region required for unwinding by HEL308.** *A.* Model fork substrates with a 3' ssDNA flap length of 0, 7, 15 or 22 nt were incubated with 0.5 pmol/ $\mu$ l of HEL308 for the stated times. Migration of substrate and product are marked. Lanes marked nt contain control substrate not treated with enzyme, and those marked B boiled substrate. The DNA substrates analyzed are schematically depicted at the bottom of the gel. A 5' asterisk indicates the position of the 5'-end radioactive labelling *B.* Quantification of product formation obtained from experiments shown in *panel A.* The percentage of substrate unwinding is shown as a function of time. Each experiment was performed in triplicate. The error bars represent standard deviation.

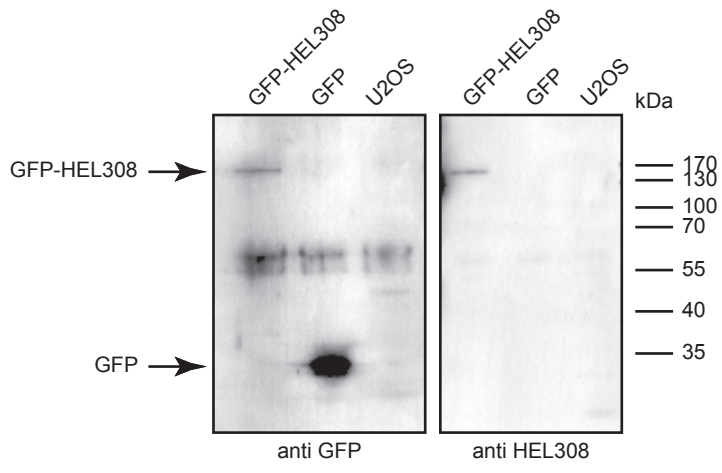

**A**

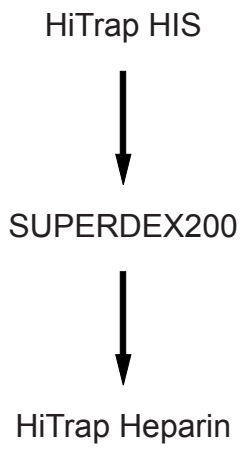

**B**

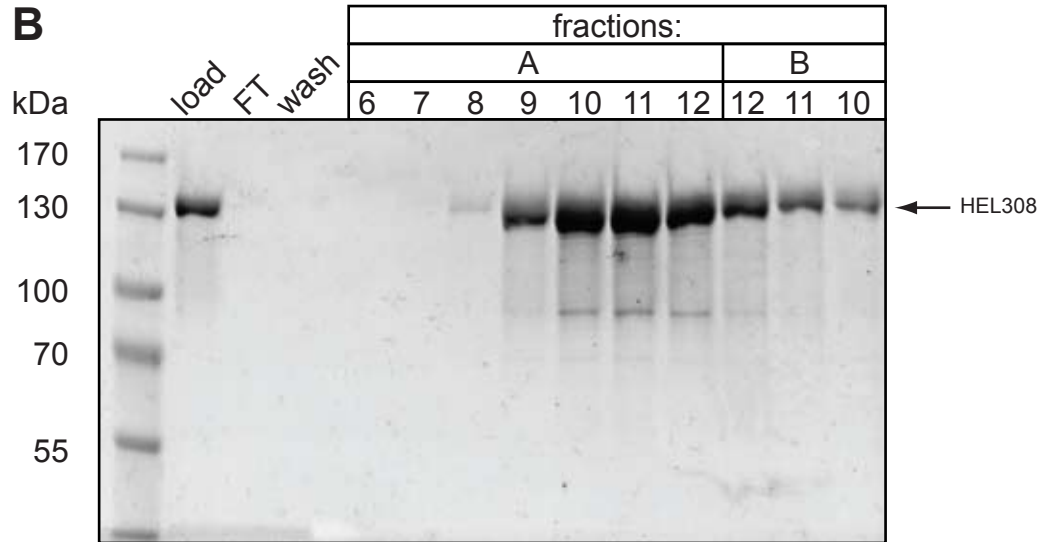

**C**

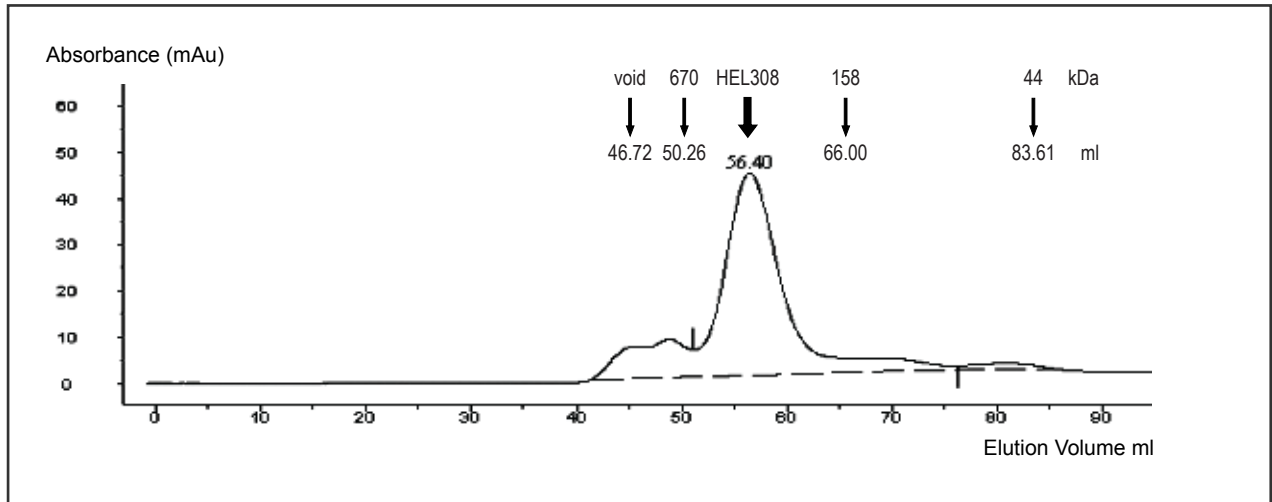

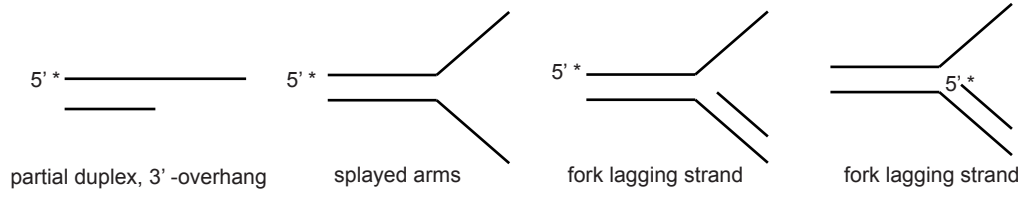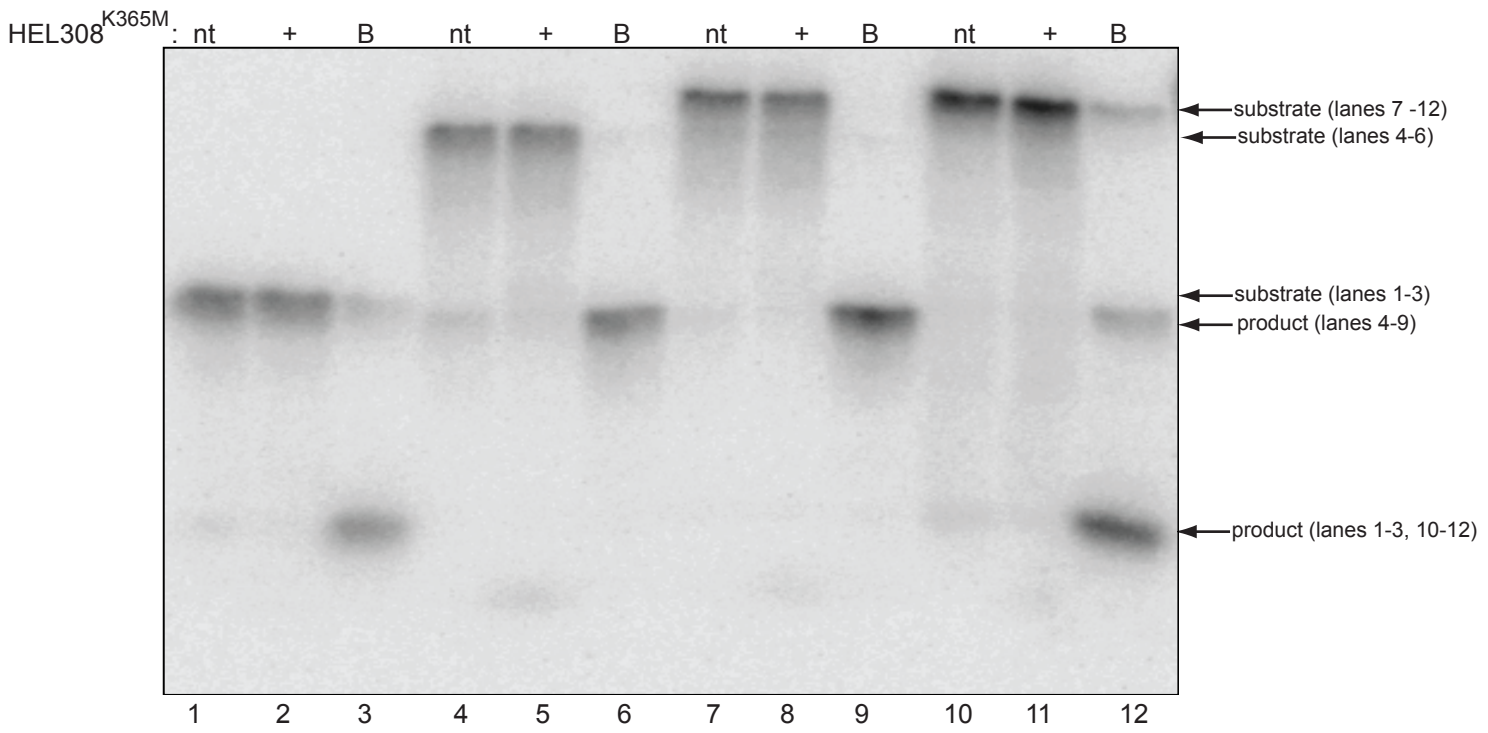

**A**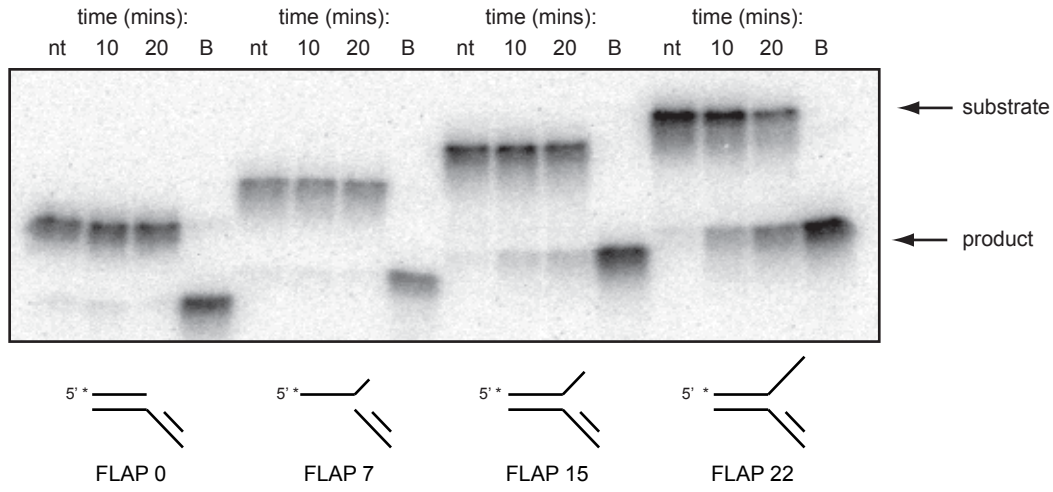**B**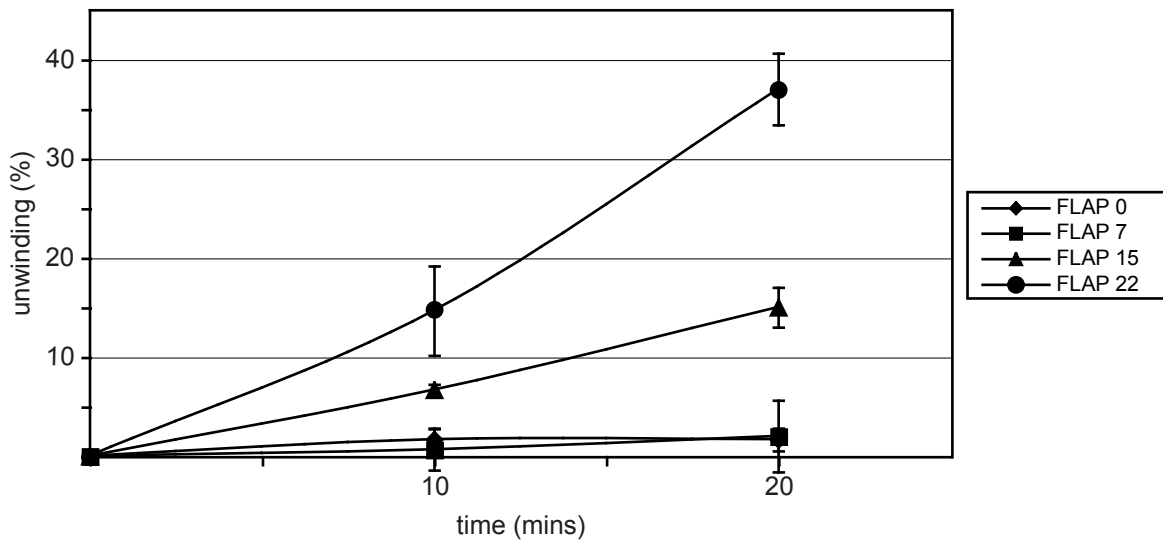

**Supplemental Table S1: DNA substrates used in this study -  
(see Suppl. Table S2 for sequences):**

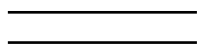

DUPLEX:  
OLIGO 1 and DUPLEX

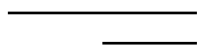

PARTIAL DUPLEX (5' OVERHANG):  
OLIGO 1 and 5' OVERHANG/NASCENT LEADING STRAND

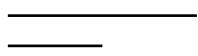

PARTIAL DUPLEX (3' OVERHANG):  
OLIGO 4 and 3' OVERHANG/NASCENT LAGGING STRAND

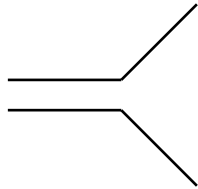

SPLAYED ARMS:  
OLIGO 1 and 4

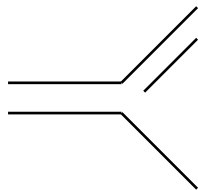

FORK WITH NASCENT LEADING STRAND:  
OLIGO 1, 4 and 5' OVERHANG/NASCENT LEADING STRAND

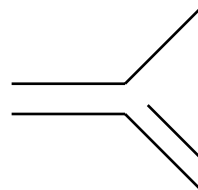

FORK WITH NASCENT LAGGING STRAND:  
OLIGO 1, 4 and 3' OVERHANG/NASCENT LAGGING STRAND

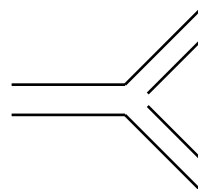

FORK:  
OLIGO 1, 4, 5' OVERHANG/NASCENT LEADING STRAND AND  
3' OVERHANG/NASCENT LAGGING STRAND

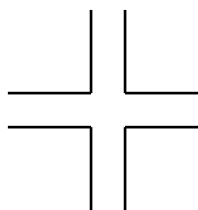

HOLLIDAY JUNCTION (MOBILE):  
OLIGO 1, 2, 3 and 4

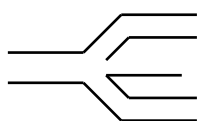

CHICKEN FOOT (5' OVERHANG):  
OLIGO 1, DUPLEX, NASCENT LEADING STRAND - MISMATCH and  
NASCENT LAGGING STRAND - LONG

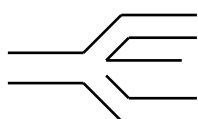

CHICKEN FOOT (3' OVERHANG):  
OLIGO1, DUPLEX, NASCENT LEADING STRAND - LONG and  
NASCENT LAGGING STRAND - MISMATCH

**Supplemental Table S1 - DNA substrates used in this study (continued) -  
(see Suppl. Table S2 for sequences):**

 FLAP 0 :  
OLIGO FLAP 0, 4 and 3' OVERHANG/NASCENT LAGGING STRAND

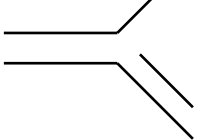 FLAP 7 :  
OLIGO FLAP 7, 4 and 3' OVERHANG/NASCENT LAGGING STRAND

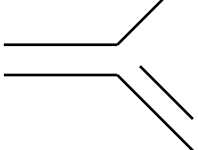 FLAP 15 :  
OLIGO FLAP 15, 4 and 3' OVERHANG/NASCENT LAGGING STRAND

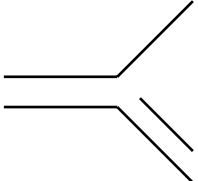 FLAP 22 :  
OLIGO 1, 4 and 3' OVERHANG/NASCENT LAGGING STRAND

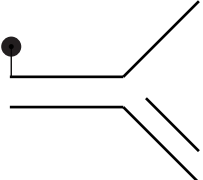 STREP 1 :  
OLIGO STREP 1, 4 and 3' OVERHANG/NASCENT LAGGING STRAND

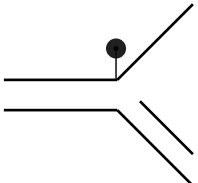 STREP 34 :  
OLIGO STREP 34, 4 and 3' OVERHANG/NASCENT LAGGING STRAND

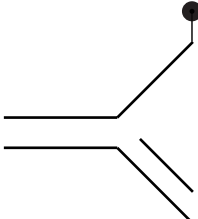 STREP 56 :  
OLIGO STREP 56, 4 and 3' OVERHANG/NASCENT LAGGING STRAND



**Supplemental Table S2: Oligonucleotide sequences of substrates used in this study:**

**OLIGO 1:**

5'GACGCTGCCGAATTCTTCTGGATTGCTAGGACATCTATTAAGCTTACGTAAACCCA

**OLIGO 2:**

5'TGGGTAAACGTAAGCTTAATAGATGTCCTAGCAAGACGAGATATCATTATGAGCCT

**OLIGO 3:**

5'AGGCTCATAATGATATCTCGTCTTGCTAGGACATGACCCTCTAGATGCAATTTCTT

**OLIGO 4:**

5'AAGAAATTGCATCTAGAGGGTCATGTCCTAGCAATCCAGAAGAATTCGGCAGCGTC

**DUPLEX:**

5'TGGGTAAACGTAAGCTTAATAGATGTCCTAGCAATCCAGAAGAATTCGGCAGCGCT

**5' OVERHANG/NASCENT LEADING STRAND:**

5'TGGGTAAACGTAAGCTTAATAG

**NASCENT LEADING STRAND MISMATCH:**

5' TGGGTAAACGTAAGCTTAATAT

**NASCENT LEADING STRAND LONG:**

5' TGGGTAAACGTAAGCTTAATATGACCCTCAGATGCAATTTCTT

**3' OVERHANG/NASCENT LAGGING STRAND:**

5'GACCCTCTAGATGCAATTTCTT

**NASCENT LAGGING STRAND MISMATCH:**

5'TTATTAAGCTTACGTAAACCCA

**NASCENT LAGGING STRAND LONG:**

TTATTAAGCTTACGTAAACCCAGTTATTAAGCTTACGTAAACCCA

**FLAP 0:**

5'GACGCTGCCGAATTCTTCTGGATTGCTAGGACAT

**FLAP 7:**

5' GACGCTGCCGAATTCTTCTGGATTGCTAGGACATCTATTAA

**FLAP 15:**

5' GACGCTGCCGAATTCTTCTGGATTGCTAGGACATCTATTAAGCT

**STREP 1:**

5'[Biotin]GACGCTGCCGAATTCTTCTGGATTGCTAGGACATCTATTAAGCTTACGTAA  
ACCA

**STREP 34:**

5'GACGCTGCCGAATTCTTCTGGATTGCTAGGACA[Biotin]TCTATTAAGCTTACGTAA  
ACCA

**STREP 56:**

5'GACGCTGCCGAATTCTTCTGGATTGCTAGGACATCTATTAAGCTTACGTAA  
ACCA [Biotin]

**LINEAR DUPLEX:**

5'GACGCTGCCGAATTCTTCTGGATTGCTAGGACATCTATTAAGCTTACGTAAACCCA  
3'CTGCGACGGCTTAAGAAGACCTAACGATCCTGTAGATAATTCGAATGCAATTGGGT

**5' OVERHANG:**

5'GACGCTGCCGAATTCTTCTGGATTGCTAGGACATCTATTAAGCTTACGTAAACCCA  
GATAATTCGAATGCAATTGGGT

**3' OVERHANG:**

GACCCTCTAGATGCAATTTCTT  
3'CTGCGACGGCTTAAGAAGACCTAACGATCCTGTACTGGGAGATCTACGTAAAGAA

**SPLAYED ARMS:**

CTATTAAGCTTACGTAAACCCA  
5'GACGCTGCCGAATTCTTCTGGATTGCTAGGACAT  
3'CTGCGACGGCTTAAGAAGACCTAACGATCCTGTA  
CTGGGAGATCTACGTAAAGAA

**FORK LEADING STRAND:**

CTATTAAGCTTACGTAAACCCA  
TGATAATTCGAATGCAATTGGGT  
5'GACGCTGCCGAATTCTTCTGGATTGCTAGGACA  
3'CTGCGACGGCTTAAGAAGACCTAACGATCCTGT  
A  
CTGGGAGATCTACGTAAAGAA

**FORK LAGGING STRAND:**

CTATTAAGCTTACGTAAACCCA  
T  
5'GACGCTGCCGAATTCTTCTGGATTGCTAGGACA  
3'CTGCGACGGCTTAAGAAGACCTAACGATCCTGT  
AGACCCTCTAGATGCAATTTCTT  
CTGGGAGATCTACGTAAAGAA

**FORK:**

CTATTAAGCTTACGTAAACCCA  
TGATAATTCGAATGCAATTGGGT  
5'GACGCTGCCGAATTCTTCTGGATTGCTAGGACA  
3'CTGCGACGGCTTAAGAAGACCTAACGATCCTGT  
AGACCCTCTAGATGCAATTTCTT  
CTGGGAGATCTACGTAAAGAA

**HOLLIDAY  
JUNCTION(MOBILE):  
OLIGO 1, 2, 3 AND 4**

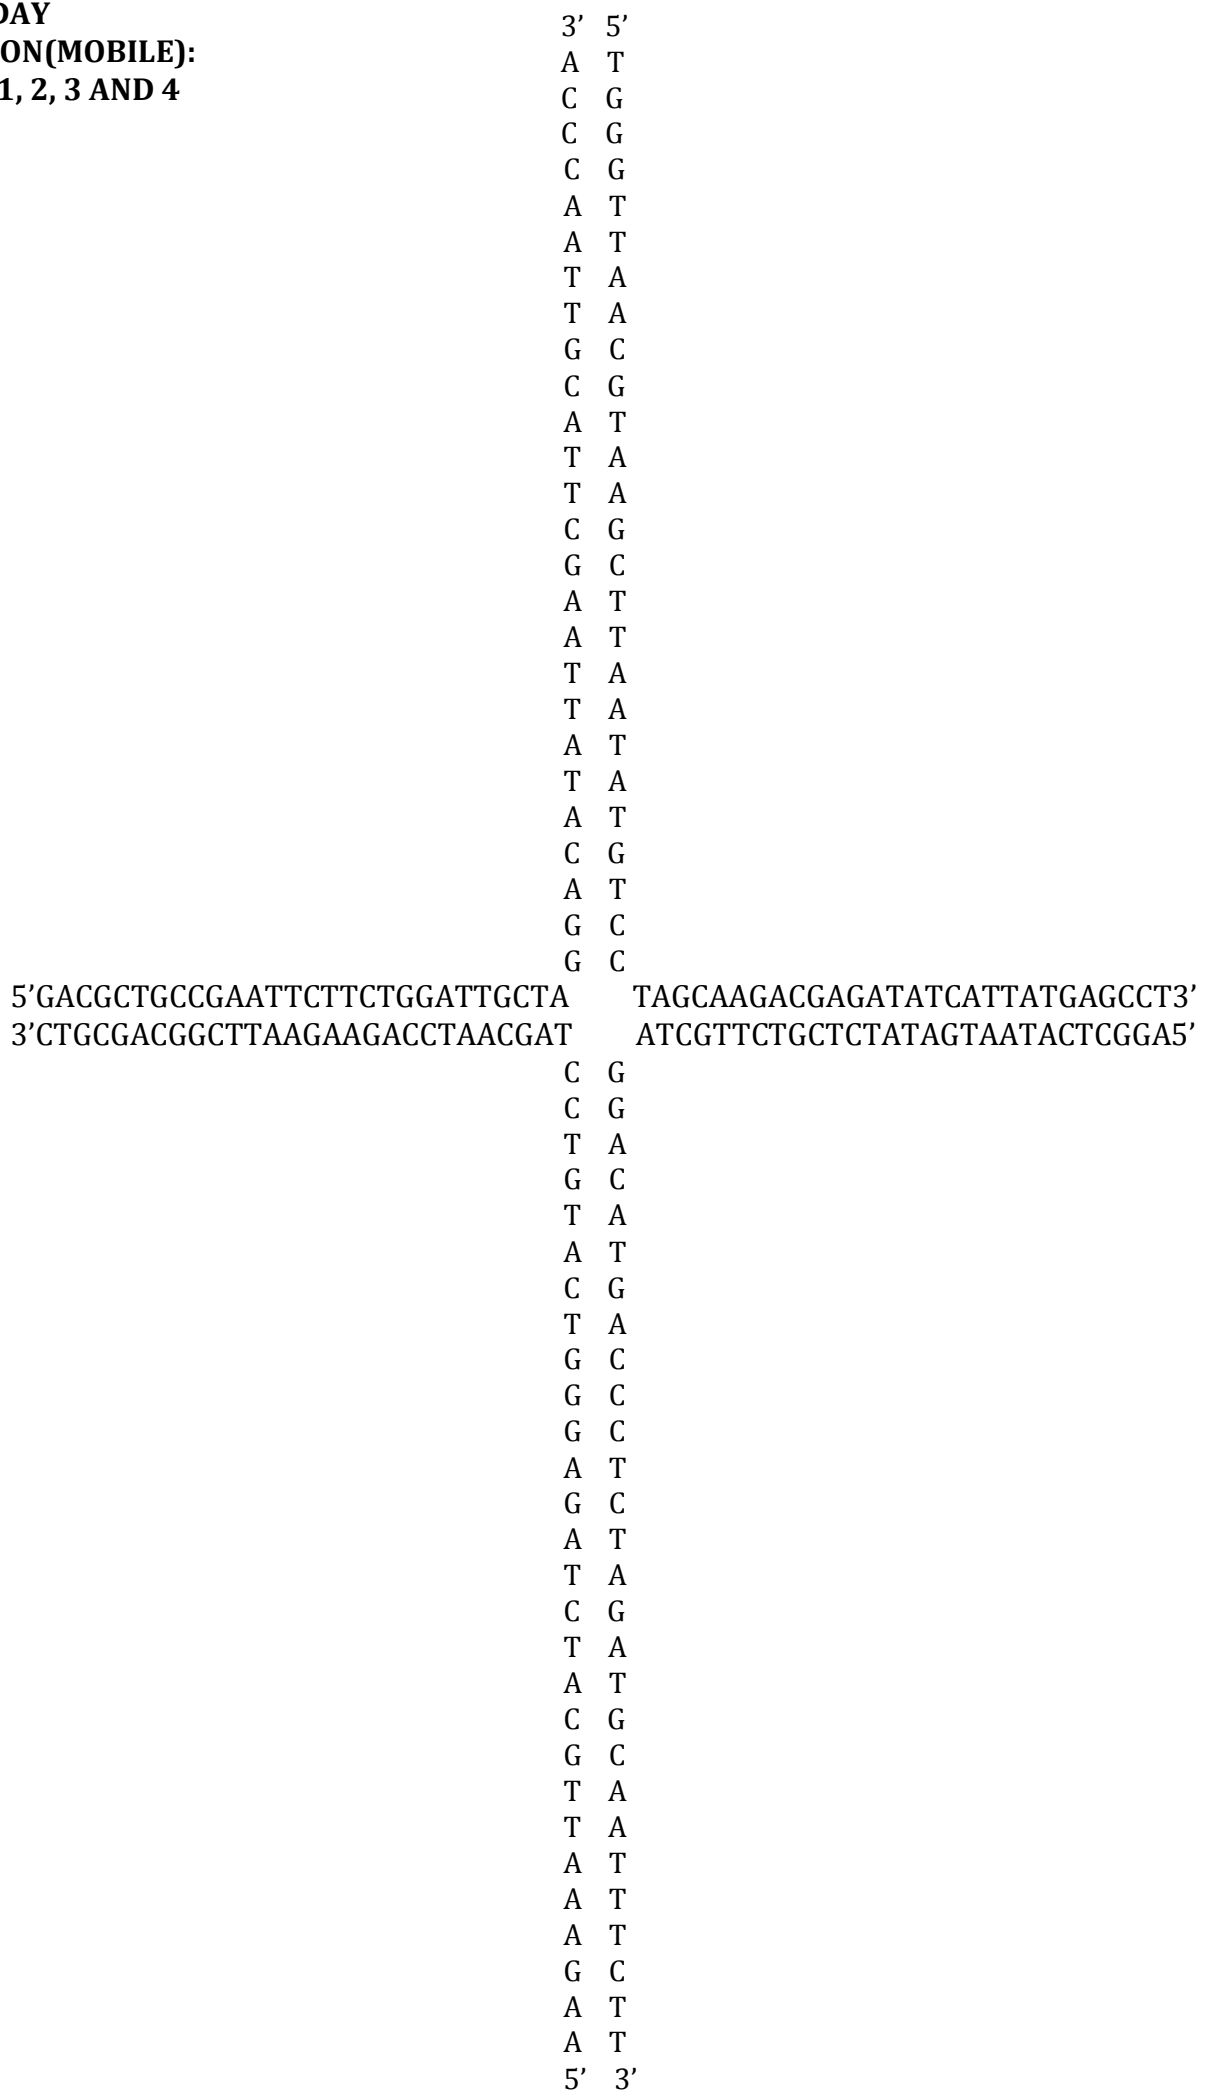

**CHICKEN FOOT 5' OVERHANG:**

```

                    TATTAAGCTTACGTTAACCCA
                    CATAATTCGAATGCAATTGGGT
                    TT
5'GACGCTGCCGAATTCTTCTGGATTGCTAGGACA ACCCTCTAGATGCAATTTCTT
3'CTGCGACGGCTTAAGAAGACCTAACGATCCTGT G
                    AT
                    GTATTAAGCTTACGTTAACCCA
                    ATAATTCGAATGCAATTGGGT
```

**CHICKEN FOOT 3' OVERHANG:**

```

                    TATTAAGCTTACGTTAACCCA
                    CATAATTCGAATGCAATTGGGT
                    TT
5'GACGCTGCCGAATTCTTCTGGATTGCTAGGACA G
3'CTGCGACGGCTTAAGAAGACCTAACGATCCTGT ACCCTCTAGATGCAATTTCTT
                    AT
                    GTATTAAGCTTACGTTAACCCA
                    ATAATTCGAATGCAATTGGGT
```

**FORK LAGGING STRAND:**

**FLAP 0:**

5'GACGCTGCCGAATTCTTCTGGATTGCTAGGACA  
3'CTGCGACGGCTTAAGAAGACCTAACGATCCTGT  
T  
AGACCCTCTAGATGCAATTTCTT  
CTGGGAGATCTACGTAAAGAA

**FLAP 7:**

5'GACGCTGCCGAATTCTTCTGGATTGCTAGGACA  
3'CTGCGACGGCTTAAGAAGACCTAACGATCCTGT  
CTATTAA  
T  
AGACCCTCTAGATGCAATTTCTT  
CTGGGAGATCTACGTAAAGAA

**FLAP 15:**

5'GACGCTGCCGAATTCTTCTGGATTGCTAGGACA  
3'CTGCGACGGCTTAAGAAGACCTAACGATCCTGT  
CTATTAAGCTTACGT  
T  
AGACCCTCTAGATGCAATTTCTT  
CTGGGAGATCTACGTAAAGAA

**FORK LAGGING STRAND BIOTIN:**

**B**  
5'GACGCTGCCGAATTCTTCTGGATTGCTAGGACA  
3'CTGCGACGGCTTAAGAAGACCTAACGATCCTGT  
CTATTAAGCTTACGTAAACCCA  
T  
AGACCCTCTAGATGCAATTTCTT  
CTGGGAGATCTACGTAAAGAA

**B**CTATTAAGCTTACGTAAACCCA  
T  
5'GACGCTGCCGAATTCTTCTGGATTGCTAGGACA  
3'CTGCGACGGCTTAAGAAGACCTAACGATCCTGT  
AGACCCTCTAGATGCAATTTCTT  
CTGGGAGATCTACGTAAAGAA

CTATTAAGCTTACGTAAACCCA **B**  
T  
5'GACGCTGCCGAATTCTTCTGGATTGCTAGGACA  
3'CTGCGACGGCTTAAGAAGACCTAACGATCCTGT  
AGACCCTCTAGATGCAATTTCTT  
CTGGGAGATCTACGTAAAGAA

**B** = Biotin
